# Supplementary material for: Multimodal human thymic profiling reveals trajectories and cellular milieu for T agonist selection
Source: PubMed Central journal article supplement (PMC9895842; doi:10.3389/fimmu.2022.1092028), 2023-01-20
Supplement: DataSheet_1.pdf [file DataSheet_1.pdf]

## Supplementary figures

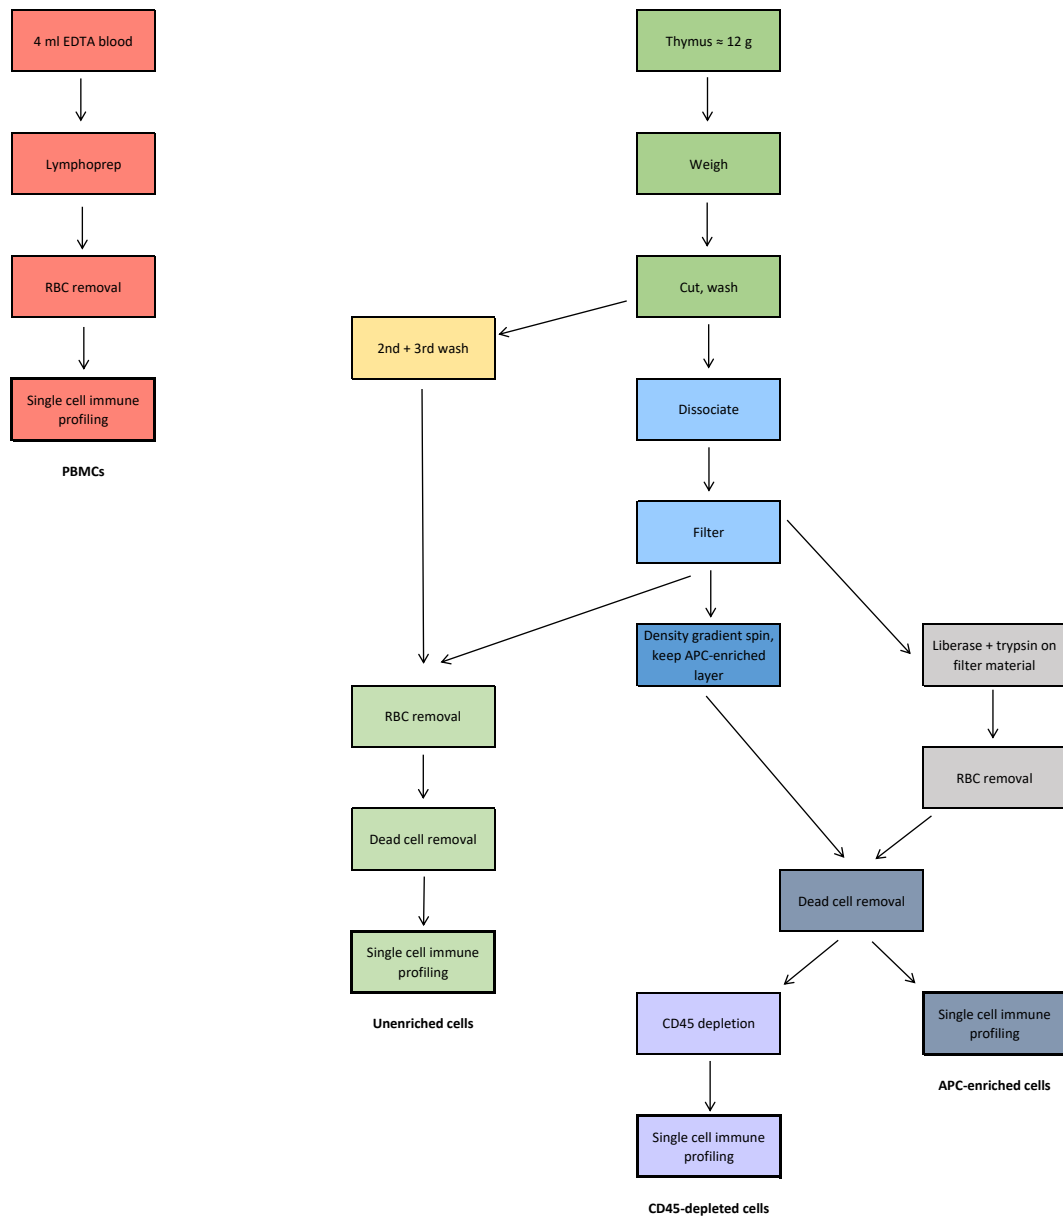

**Supplementary Figure S1: Schematic overview of the protocol for dissociation and enrichment of thymic samples for single cell immune profiling. RBC = red blood cell.**



enriched, or CD45-depleted) to the full, integrated thymic dataset. Events stemming from the respective sample type indicated in green. **C.** Pie charts indicating the distribution of cell types within each enriched sample type, grouped as “early thymocytes” (DN(P), DN(Q), DP(P), DP(Q)), “late thymocytes” ( $\alpha\beta$ T(entry), CD4<sup>+</sup> SP, CD8<sup>+</sup> SP), “agonist thymocytes” (CD8 $\alpha\alpha$ (I), CD8 $\alpha\alpha$ (II), T<sub>(agonist)</sub>, T<sub>reg</sub>(diff), T<sub>reg</sub>), “hematopoietic APC” (pDC, DC1, DC2/Mono, aDC, B cell, B plasma), “non-hematopoietic stromal” (cTEC, mcTEC/mTEC(I), mTEC(II), mTEC(III), TEC(myo), TEC(neuro), Endo\_1-3, Mural\_1-3, Fibro\_1-4), and “other” (NK, NKT, macrophage, erythrocyte). **D.** Density plot created by Nebulosa, showing expression of *CD3D/CD3* at RNA (left) and protein (right) level. adt = antibody derived tag. **E.** RNA level expression of *HLA-DRA* and *PTPRC* in the full dataset. **F.** Expression of selected proteins in annotated cell populations by antibody capture.

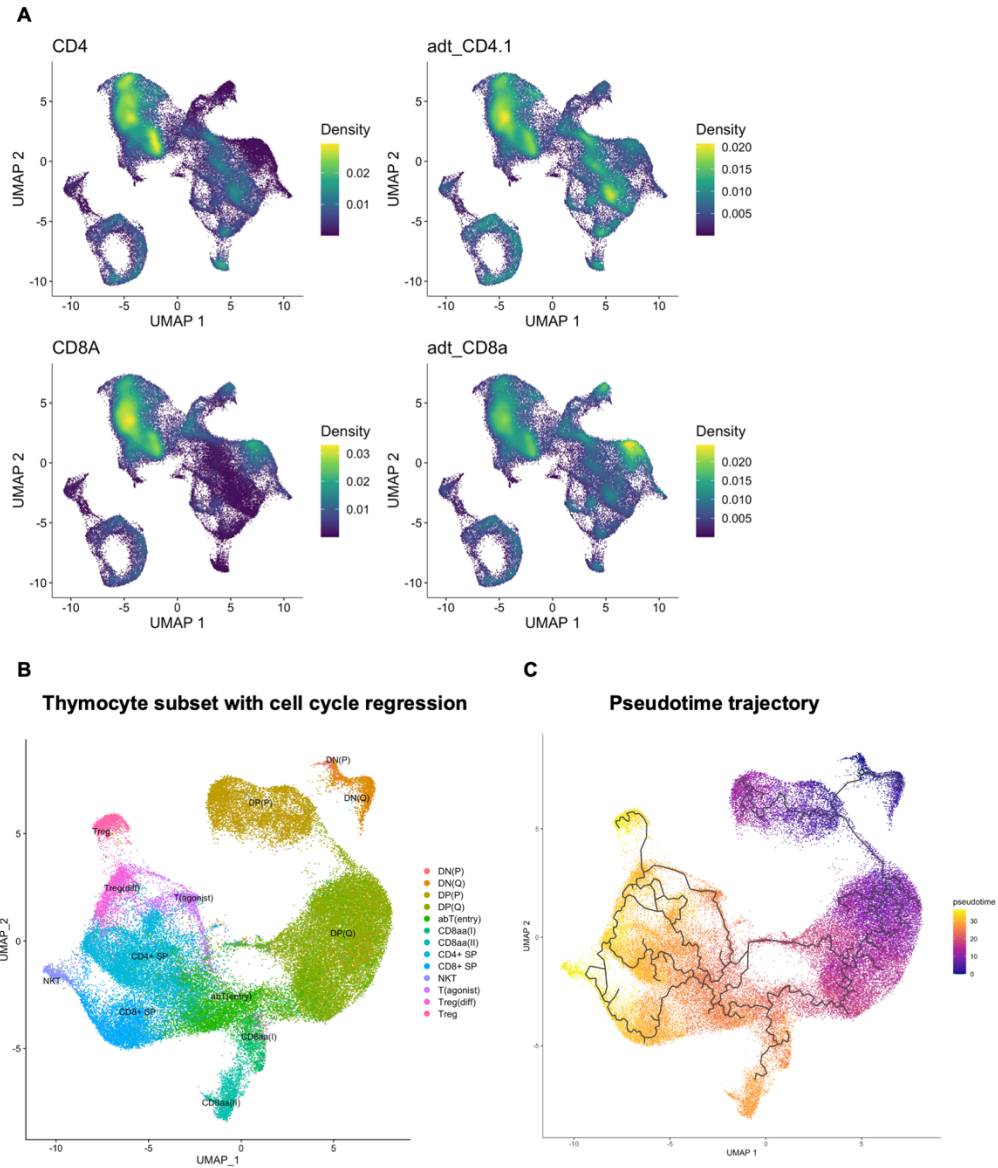

**Supplementary Figure S3: Reanalysis of thymocyte subset.** **A.** Density plot created by Nebulosa showing expression of CD4 and CD8A at RNA (left) and protein (right) level. adt = antibody derived tag. **B.** Annotated UMAP of thymocyte subset after regressing out the effect of cell cycle scores calculated according to gene lists provided by Seurat. **C.** Pseudotime analysis of thymocyte subset after cell cycle regression by Monocle3.

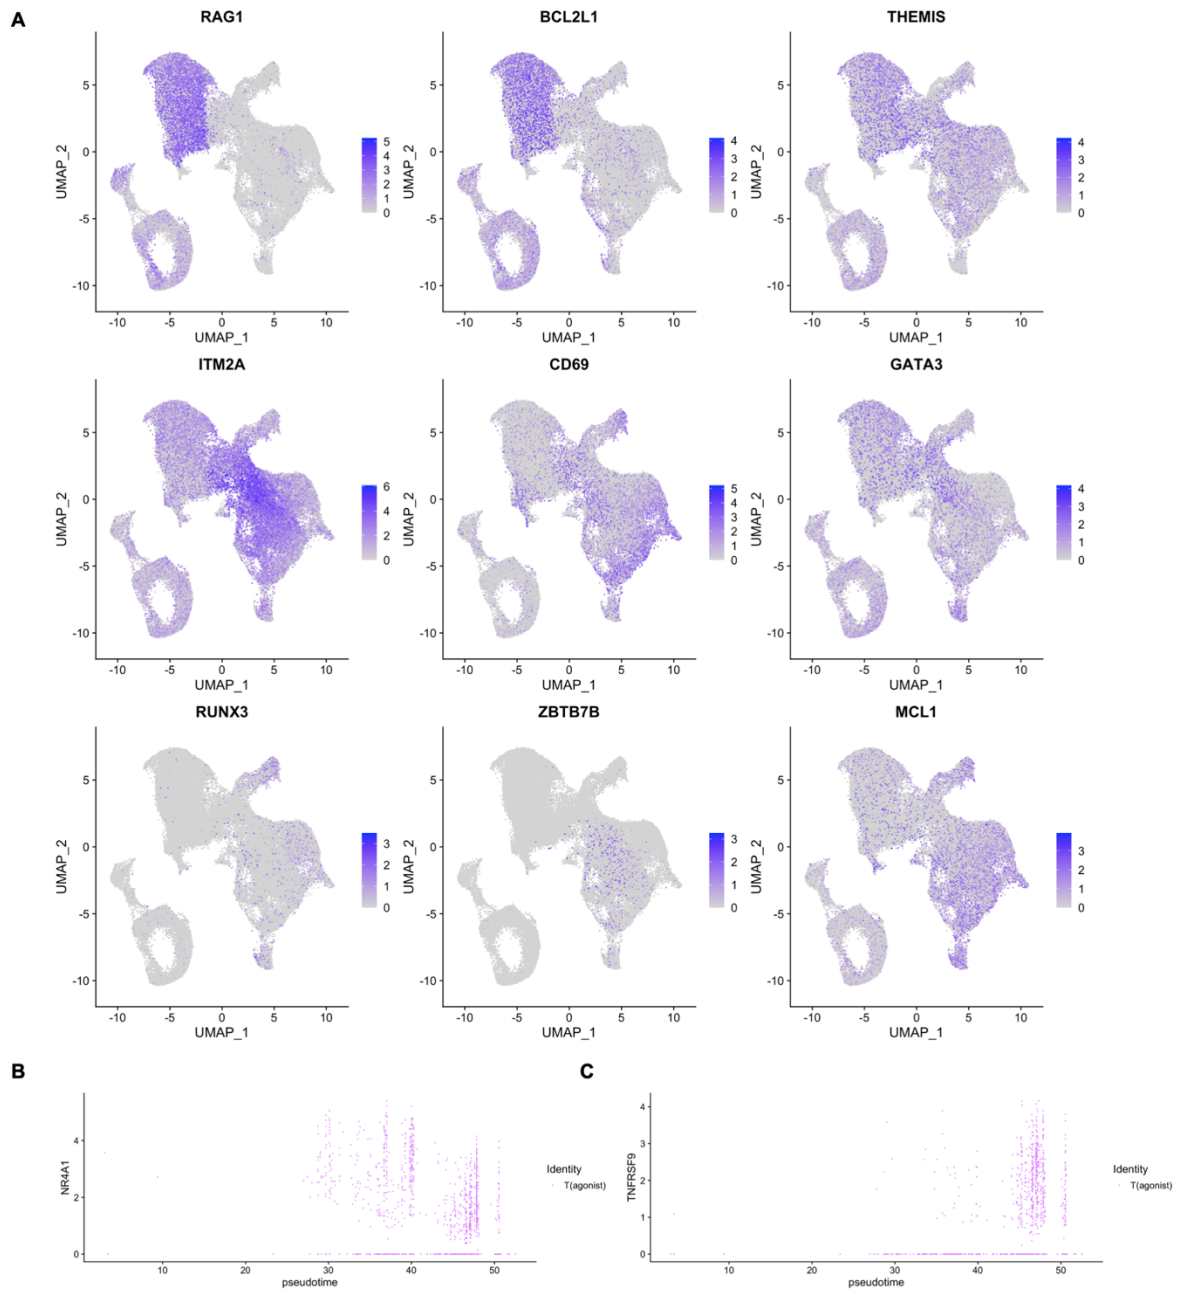

**Supplementary Figure S4: Gene expression in the thymocyte subset. A.** Expression of selected genes in thymocyte subset. **B.** and **C.** Expression of selected genes in the  $T_{(\text{agonist})}$  cluster along pseudotime.

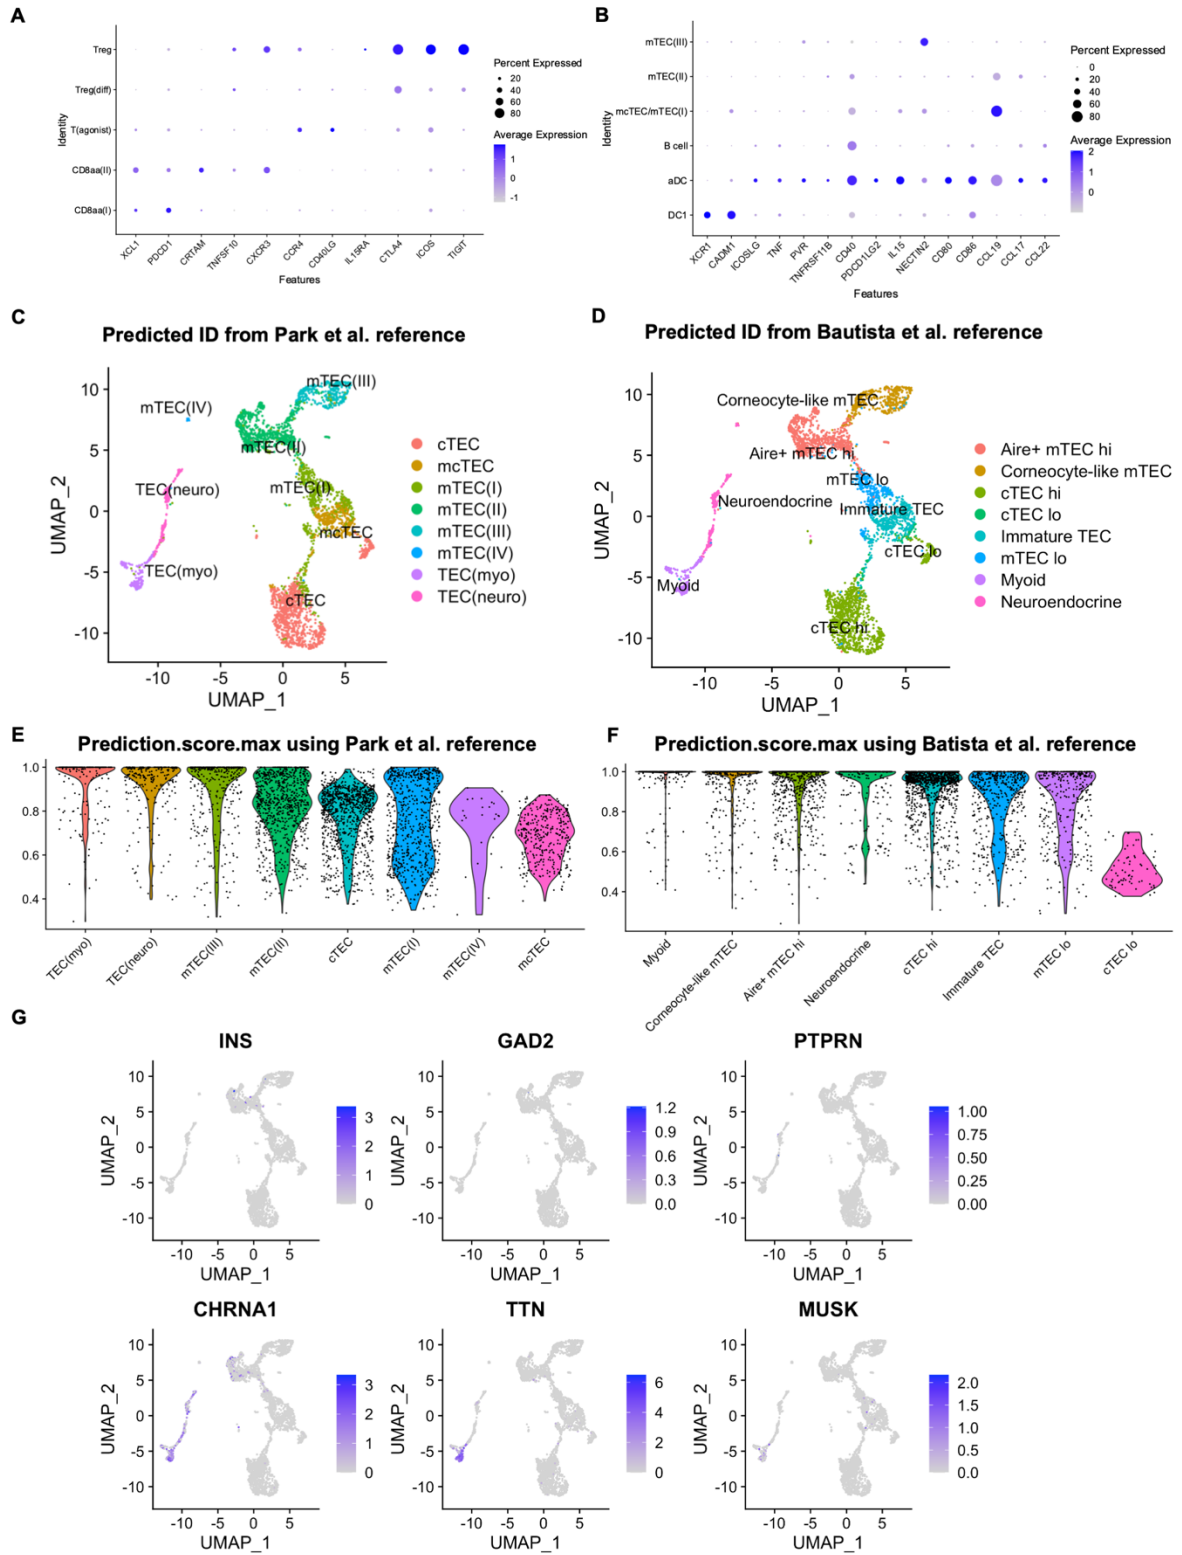

**Supplementary Figure S5: Reanalysis of the epithelial cell subset and comparison to previously published datasets.** **A.** and **B.** Expression of ligands/receptors across cell populations from the initial low-level annotations. **C.** and **D.** Predicted annotations for the TEC subset by label transfer using the Park et al. and Bautista et al. paediatric TEC subsets as reference. **E.** and **F.** Predictions scores for the label transfer from Park et al. and Bautista et al. paediatric TEC subsets. **G.** Expression of selected tissue restricted antigens in the TEC subset.

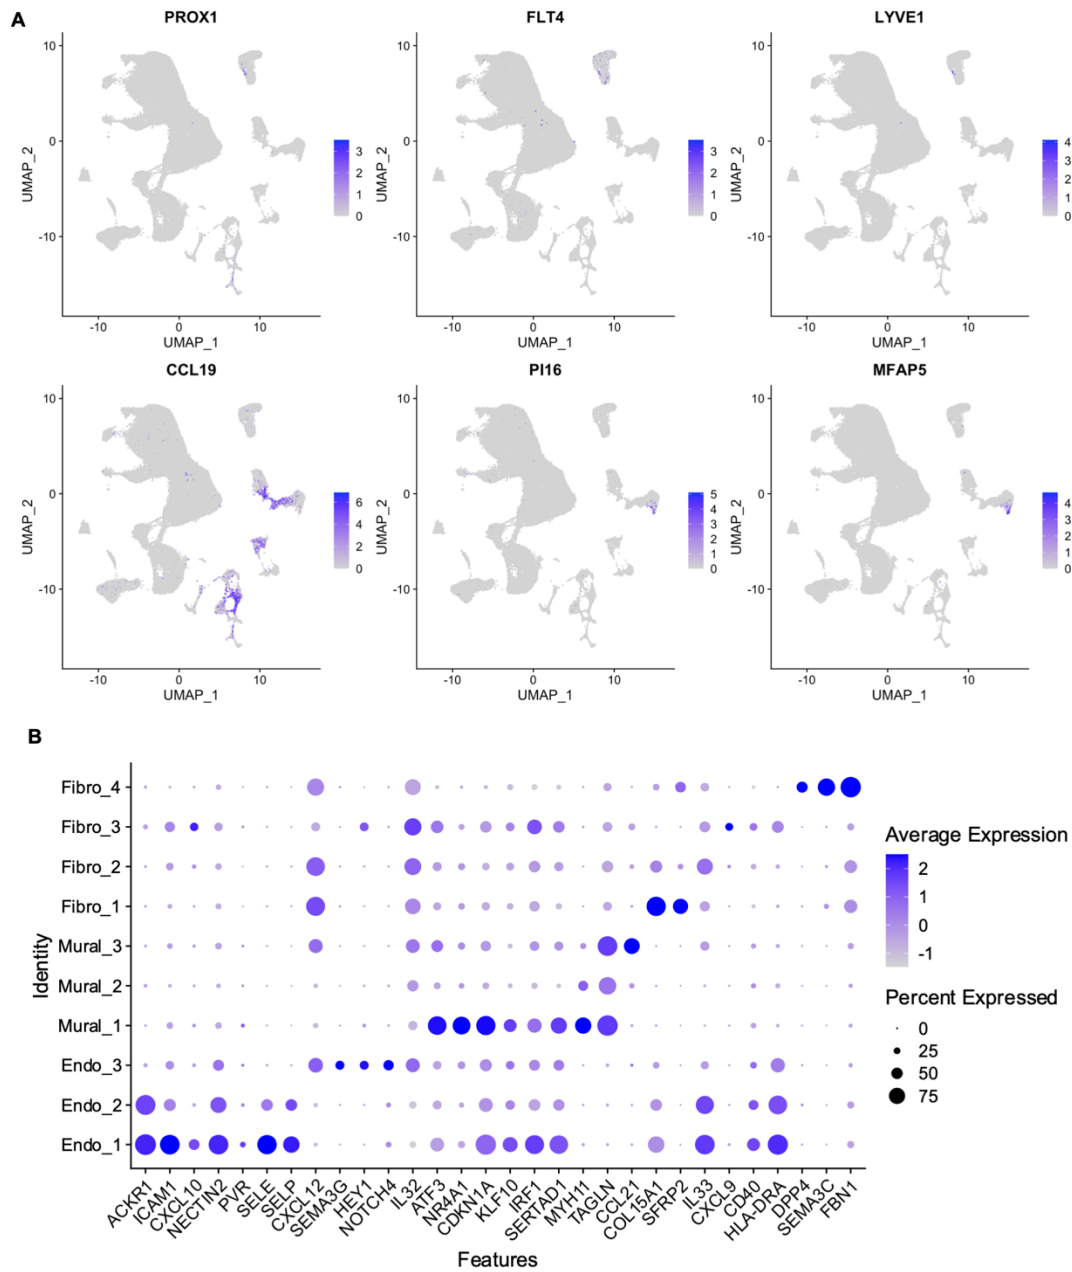

**Supplementary Figure S6: Expression of selected genes associated with non-TEC stromal cells. A.** Expression of selected genes associated with stromal cell populations in the full thymic dataset. **B.** Expression of selected genes across the non-TEC stromal cell populations.



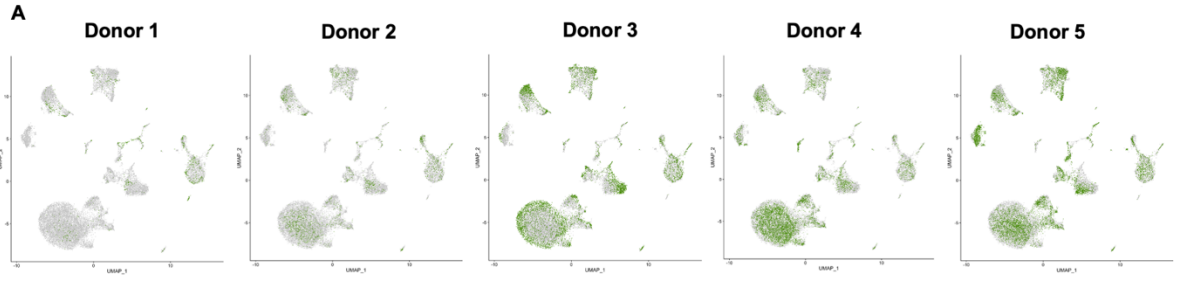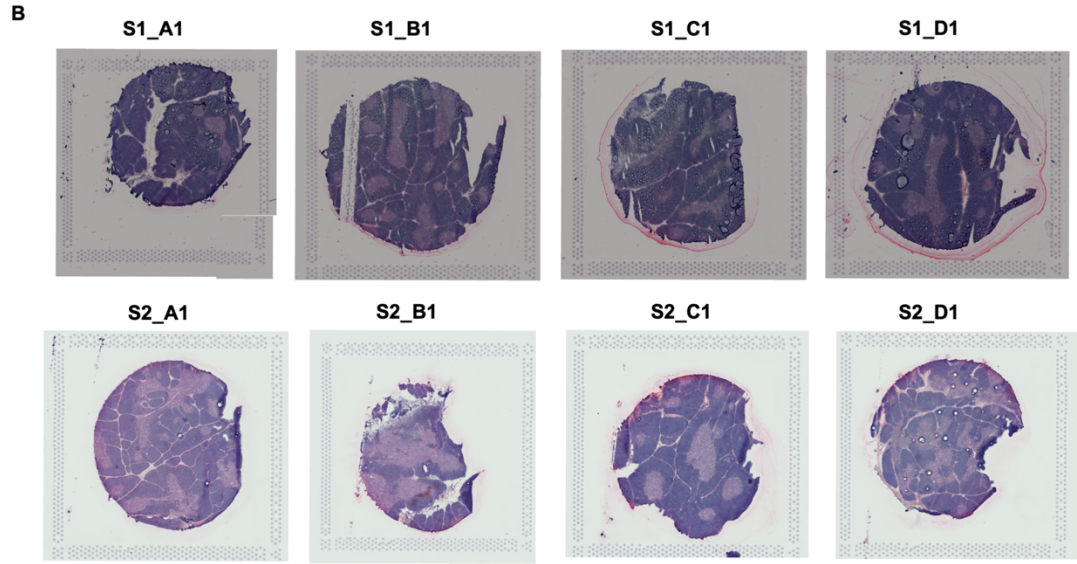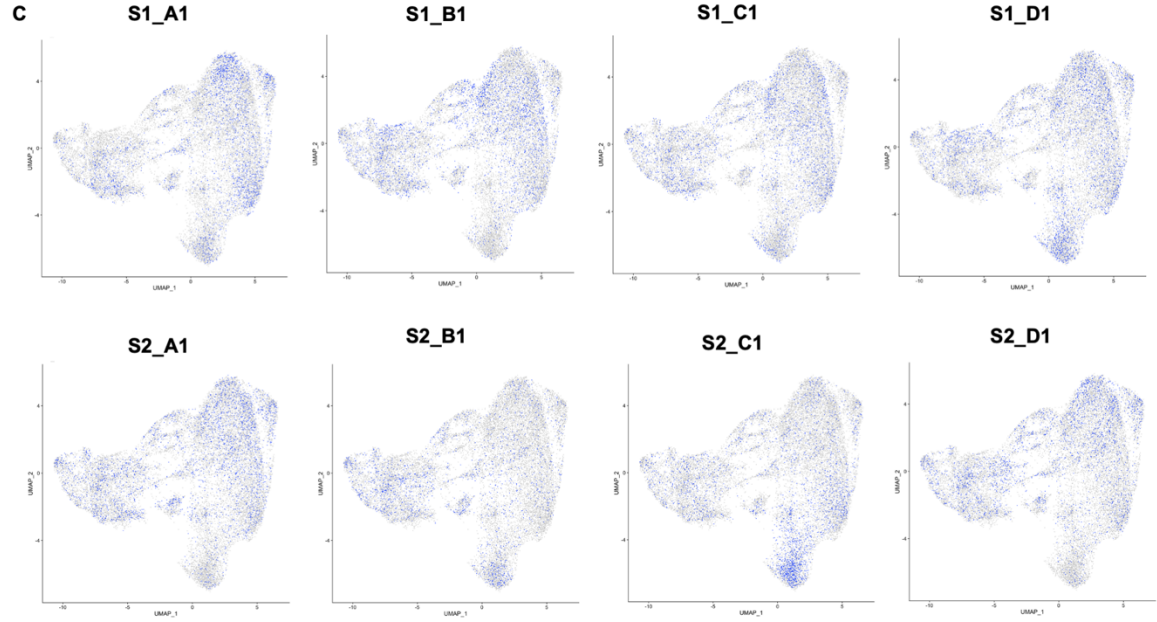

**Supplementary Figure S7: Donor distribution across PBMC and spatial transcriptomics datasets. A.** Contribution of samples from each donor to the integrated PBMC CITE-seq dataset. Events stemming from the respective donor indicated in green. **B.** H&E stained images of tissue sections included in the spatial transcriptomics dataset. **C.** Contribution of samples from each donor to the integrated spatial transcriptomics dataset. Events stemming from the respective donor indicated in blue.

**A**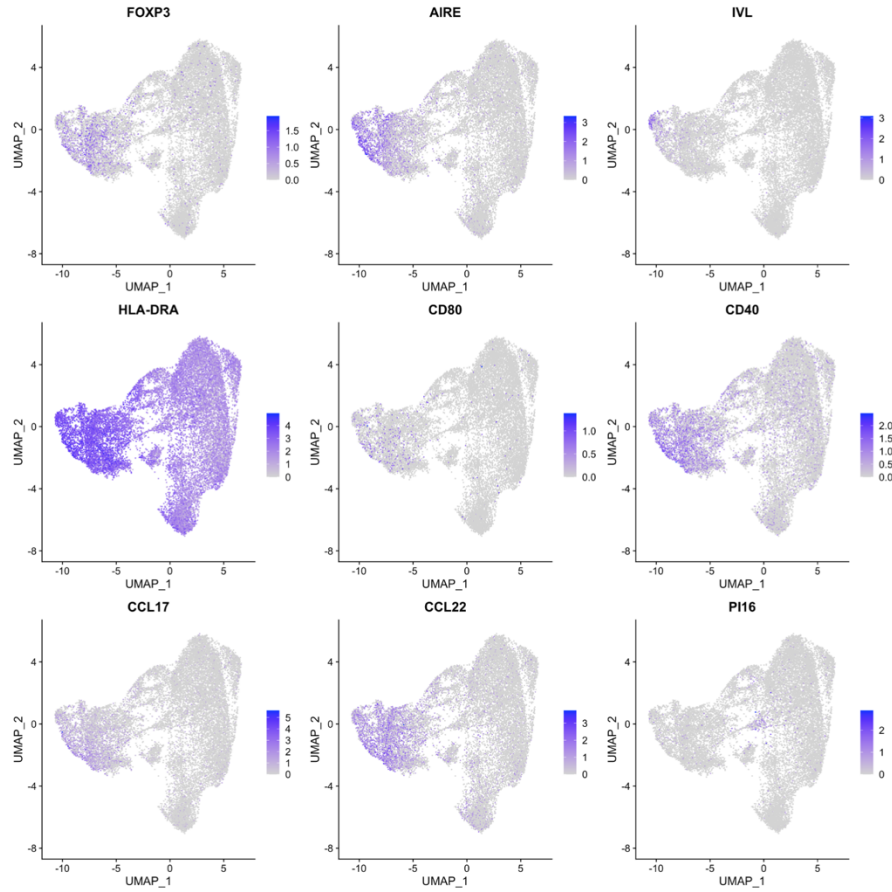**B**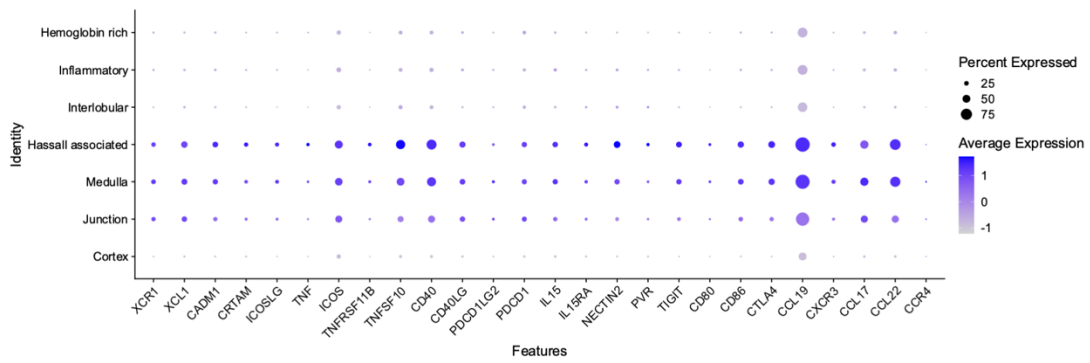

**Supplementary Figure S8: Expression of selected genes in the spatial transcriptomics dataset.**



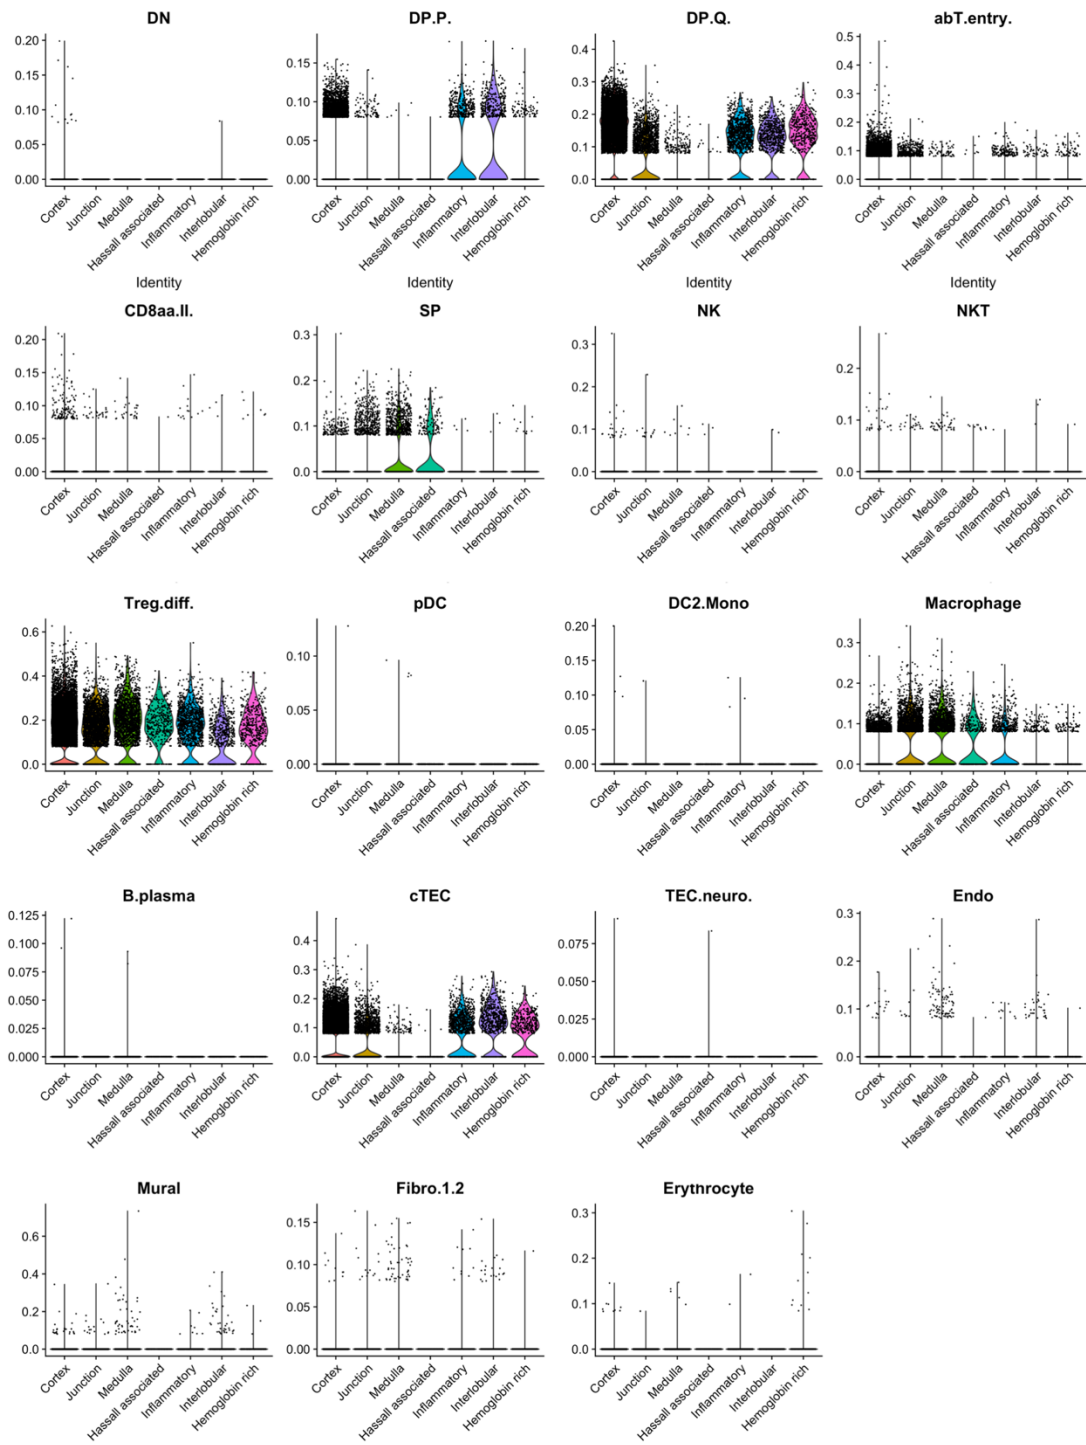

**Supplementary Figure S10: Predicted proportion of selected populations among annotated tissue spots.**

## Supplementary tables

**Supplementary Table S1:** Donor metadata

| <b>Donor</b> | <b>Sex</b> | <b>Age</b>  | <b>Application</b>           |
|--------------|------------|-------------|------------------------------|
| D1           | Male       | 7 days      | Single cell immune profiling |
| D2           | Male       | 2.5 months  | Single cell immune profiling |
| D3           | Female     | 9 months    | Single cell immune profiling |
| D4           | Female     | 1.6 months  | Single cell immune profiling |
| D5           | Male       | 13.5 months | Single cell immune profiling |
| S1_A1        | Male       | 5 months    | Spatial transcriptomics      |
| S1_B1        | Male       | 10 days     | Spatial transcriptomics      |
| S1_C1        | Male       | 4 months    | Spatial transcriptomics      |
| S1_D1        | Female     | 9 months    | Spatial transcriptomics      |
| S2_A1        | Male       | 5.5 months  | Spatial transcriptomics      |
| S2_B1        | Male       | 5 months    | Spatial transcriptomics      |
| S2_C1        | Female     | 5.5 months  | Spatial transcriptomics      |
| S2_D1        | Female     | 12 months   | Spatial transcriptomics      |

## Supplementary .csv table titles

**Supplementary Table S2:** Antibodies used for staining of CITE-seq samples

**Supplementary Table S3:** Differentially expressed genes for annotated clusters in the full dataset.

**Supplementary Table S4:** Differentially expressed genes for annotated clusters in the thymocyte subset.

**Supplementary Table S5:** Differentially expressed genes for annotated clusters in the DC subset, B cell subset, and TEC subset.

**Supplementary Table S6:** Differentially expressed genes for annotated clusters in the spatial transcriptomics dataset.

**Supplementary Table S7:** Quality control statistics for CITE-seq and spatial transcriptomics datasets.

**Supplementary Table S8:** Cell type proportions of annotated cell populations across samples.
